# Supplementary material
Source: PubMed Central journal article supplement (PMC3532009)
Supplement: 97320630081249S1.pdf [file 97320630081249S1.pdf]

## Supplementary material:

**Table 1:** Table representing amino acids contributing for binding pocket and chemo-preventive analysis for the top 9 anti-angiogenic natural compounds screened through HEX.

| Serial no | Molecule (Compound Id)              | Amino acid base (H bond distance in Å <sup>0</sup> ) | Ames test | Health effect |                       |                         |        |       |       | rank |
|-----------|-------------------------------------|------------------------------------------------------|-----------|---------------|-----------------------|-------------------------|--------|-------|-------|------|
|           |                                     |                                                      |           | Blood         | Cardiovascular system | Gastrointestinal system | Kidney | Liver | Lungs |      |
| 1         | Pazopanib (P)                       | LEU 32 (1.63),<br>GLY 59 (1.73)                      | 0.048     | 0.57          | 0.75                  | 0.93                    | 0.27   | 0.23  | 0.50  | Ref  |
| 2         | Lactoferrin (L)                     | GLU 30 (2.21),<br>PRO 28 (2.57),<br>HIS 27 (2.03)    | 0.642     | 0.93          | 0.99                  | 1.00                    | 0.93   | 0.98  | 0.99  | -    |
| 3         | Benzophenone 3 (Be)                 | LEU 32 (2.77),<br>GLY 52 (2.03)                      | 0.099     | 0.11          | 0.29                  | 0.28                    | 0.33   | 0.04  | 0.55  | -    |
| 4         | Phytoestrogens (Ph)                 | GLY 59 (2.71)                                        | 0.105     | 0.31          | 0.41                  | 0.30                    | 0.87   | 0.49  | 0.40  | -    |
| 5         | Finasteride (F)                     | LEU 32 (1.56),<br>GLY 59 (2.17)                      | 0.001     | 0.82          | 0.91                  | 0.65                    | 0.92   | 0.94  | 0.98  | 4    |
| 6         | Curcumin (C)                        | PHE 47 (2.01)                                        | 0.033     | 0.62          | 0.95                  | 0.24                    | 0.42   | 0.69  | 0.51  | 1    |
| 7         | Epigallocatechin Gallate [EGCG] (E) | GLU 13 (1.21)                                        | 0.037     | 0.78          | 0.92                  | 0.98                    | 0.83   | 0.67  | 0.96  | 2    |
| 8         | Milk Thistle (M)                    | GLY 59 (2.22)                                        | 0.262     | 0.99          | 0.93                  | 1.00                    | 0.87   | 0.90  | 0.95  | -    |
| 9         | Npfl-86i (N)                        | LEU 32 (2.44),<br>CYS 32 (2.46),<br>THR 31 (2.34)    | 0.237     | 0.77          | 0.97                  | 1.00                    | 0.73   | 0.98  | 0.99  | -    |
| 10        | Barringtonol (B)                    | GLU 30 (2.50),<br>1.59)                              | 0.000     | 0.80          | 1.00                  | 0.99                    | 1.00   | 0.77  | 1.00  | 3    |

|  |             |  |                 |  |             |  |                  |
|--|-------------|--|-----------------|--|-------------|--|------------------|
|  | <b>GOOD</b> |  | <b>MODERATE</b> |  | <b>POOR</b> |  | <b>REFERENCE</b> |
|--|-------------|--|-----------------|--|-------------|--|------------------|
